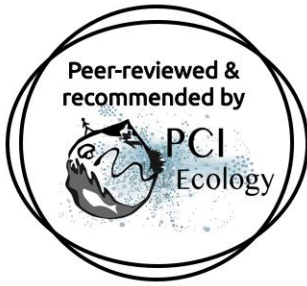

## Functional trade-offs: exploring the temporal response of field margin plant communities to climate change and agricultural practices

4 **Isis Poinas<sup>1,2\*</sup>, Christine N Meynard<sup>1</sup>, Guillaume Fried<sup>2</sup>**

5 <sup>1</sup> CBGP, INRAE, CIRAD, Institut Agro, IRD, Univ Montpellier, Montpellier, France

6 <sup>2</sup> Anses, Laboratoire de la Santé des Végétaux, Unité Entomologie et Botanique, 755 avenue du  
7 campus Agropolis, CS30016, 34988 Montferrier-sur-Lez Cedex, France

8 \* Corresponding author: Isis Poinas ([isispoinas@gmail.com](mailto:isispoinas@gmail.com))

9

10 **Authorship statement:** I.P., G.F. and C.N.M. planned and designed the research; I.P. analyzed the data  
11 and wrote the first draft of the manuscript; G.F. and C.N.M. contributed substantially to revisions. All  
12 authors gave final approval for publication.

13 **Data accessibility statement:** Data available via the Data INRAE Repository at  
14 <https://doi.org/10.57745/QAMAWM>

15 **Number of words in abstract:** 382

16 **Number of words in main text (Introduction to Conclusion):** 4845

17 **Number of cited references:** 54

18 **Number of tables:** 1

19 **Number of figures:** 7

20

21 **Abstract**

22 Over the past decades, agricultural intensification and climate change have led to vegetation shifts.  
23 However, functional trade-offs linking traits responding to climate and farming practices are rarely  
24 analyzed, especially on large-scale empirical studies. Here we used a standardized yearly monitoring  
25 effort of agricultural field margin flora at the national scale to assess the temporal response of diversity  
26 and functional traits to variations in climate and intensity of agricultural practices. We examined  
27 temporal trends in climate (temperature, soil moisture), intensity of agricultural practices (herbicides,  
28 fertilization, margin management), plant species richness, and community-weighted means and  
29 variances of traits expected to vary both with climate and agricultural practices (e.g. seed mass, specific  
30 leaf area), across 555 sites in France between 2013 and 2021. We found clear temporal climatic trends  
31 (temperature increased while soil moisture decreased), whereas trends in agricultural practices were  
32 weak over the past decade, with only slight decreases in herbicides and margin management intensity.  
33 During the same period, functional changes in plant communities were significant, showing an increase  
34 of thermophilic species (including some Mediterranean species) with a conservative resource  
35 acquisition strategy (high stature, late and short flowering), mainly explained by climate change. The  
36 reduction in field margin management intensity (mainly mowing), also resulted in a vegetation shift  
37 towards a more conservative strategy. In contrast, there was no impact of the slight temporal changes  
38 of practices conducted within cultivated fields (herbicides, fertilization) on vegetation changes. Our  
39 findings suggest that species adapted to climate change (including Mediterranean and conservative  
40 species) have temporally increased in proportion. Importantly, we identified functional trade-offs  
41 indicating that these species are also the most vulnerable to intensive agricultural practices, as they  
42 are less adapted to high levels of resources and disturbances. We put these results into the conceptual  
43 framework of Grime's CSR triangle and revealed a temporal decline of competitive and ruderal species  
44 in favor of stress-tolerant species better adapted to climate change. Choosing less intensive  
45 management can broaden the functional spectrum of agricultural plant communities, by maintaining  
46 the ability of stress-tolerant species selected by climate change to colonize habitats largely dominated

47 by ruderals. Put together, these results suggest that climate change and agricultural intensification  
48 could have synergistic negative impacts on plant diversity in field margins, highlighting the need to  
49 study several biodiversity drivers at the same time in anthropized landscapes.

50

51 **Keywords:** functional trade-offs, climate change, temporal variation, field margin, plant diversity,  
52 agricultural practices, CSR strategies, Mediterranean species, phenology

53 **Introduction**

54

55 Since the 1950s, agricultural intensification has led to declining biodiversity (Emmerson et al., 2016),  
56 while climate change has caused notable changes in a wide range of taxa and habitats (Lovejoy, 2006).  
57 However, teasing out the relative importance of these two drivers on community trajectories can be  
58 quite challenging (Oliver & Morecroft, 2014). Since agricultural intensification took place in the 1950s  
59 in Europe, the main changes linked to agricultural practices (notably in terms of intensity in pesticide  
60 use and fertilization) in plant communities have likely already occurred (Lososová et al., 2004). For  
61 example, a meta-analysis considering 32 studies across Europe and covering the time period from 1939  
62 to 2011 showed that weed species richness declined up to the 1980s, but has stabilized or even  
63 increased since then (Richner et al., 2015). Pesticide reduction plans have had so far little effect in  
64 France (Guichard et al., 2017), hindering the detection of temporal changes in biodiversity linked to  
65 changes in pesticide use. Conversely, short-term declines in species diversity due to climate change  
66 have been observed (e.g. Fonty et al., 2009), and recent temperature increases in France may impact  
67 plant communities similarly (Baude et al., 2022; Martin et al., 2019).

68 Temporal changes in plant communities cannot be discerned solely using taxonomic approaches due  
69 to the differing traits affected by resource availability and disturbance levels (Garnier & Navas, 2012);  
70 therefore, a functional approach provides an additional perspective to accurately understand these  
71 changes. This is particularly important in agroecosystems, where both resource (fertilization) and  
72 disturbance (herbicides, field margin management) gradients play crucial roles in shaping communities  
73 (Gaba et al., 2014; MacLaren et al., 2020). For instance, weeds with a ruderal strategy (low height and  
74 seed mass, long and early flowering, high SLA) are better adapted to agricultural disturbances, such as  
75 tillage, herbicides or management by mowing (Grime, 2006; Fried et al., 2022). At the same time, traits  
76 responding to agricultural practices can co-vary with other traits that are linked to resource acquisition,  
77 competitive ability, or climate. For example, seed mass, which is often used as a proxy for competitive  
78 ability, increases along soil fertility, temperature and solar radiation gradients (Fried et al., 2022;

79 Murray et al., 2004). Furthermore, correlations among different traits may represent trade-offs that  
80 impact community adaptation (Díaz et al., 2016; Wright et al., 2004). Because of these trade-offs,  
81 selective pressures due to one driver (e.g. climate change) may impact community properties along  
82 the other (e.g. agricultural intensification). In this context, Grime (1977) proposed a framework called  
83 the CSR triangle, which defines three strategies (competitiveness, stress-tolerance, and ruderality)  
84 along two axes of variation (resource and disturbance). These strategies are correlated to multiple  
85 traits and have proven useful to understand plant community dynamics in agroecosystems (Fried et  
86 al., 2022). As traits responding to climate and agricultural practices may co-vary (Garnier & Navas,  
87 2012), it can be difficult to identify the main drivers behind community changes, making this  
88 framework potentially useful to understand such trade-offs.

89 To understand the complex interactions between climate change and agricultural practices, it is thus  
90 essential to examine temporal changes in species trait distribution. For example, in French wheat  
91 fields, ruderal species increased their frequency between the 1970s and 2000s, potentially due to their  
92 ability to escape recurrent disturbances, such as herbicide applications (Fried et al., 2012). Inter-annual  
93 variations in specific leaf area, leaf dry matter content and plant height are related to nitrogen supply  
94 (Borgy et al., 2017; Gaba et al., 2014), while increased precipitations push the foliar economic spectrum  
95 towards more acquisitive species (i.e. with higher SLA; Wheeler et al., 2023). Additionally, mean  
96 thermal preference of plant communities, as well as their phenology, can vary over time in response  
97 to temperature changes, even over relatively short periods (Bellard et al., 2012; Martin et al., 2019).  
98 These temporal variations in functional traits reveal patterns that cannot be assessed solely with  
99 space-for-time substitution.

100 In this study, we aimed at deciphering how inter-annual temporal variations and temporal trends in  
101 climate (temperature, soil moisture) and agricultural practices (frequency of herbicide use, margin  
102 management and nitrogen dose in fertilizers) in France structure species richness, trait composition  
103 and ecological strategies of field margin plant communities. We studied the herbaceous field margin,

104 which represents the uncultivated vegetated area located between the cultivated strip and the  
105 adjacent habitat. Using a standardized national monitoring effort spanning 9 years (2013-2021) in 555  
106 agricultural field margins covering continental France, our study stands as one of the first to investigate  
107 the temporal trends in agricultural practices and climate, and explore the response of species richness,  
108 trait composition and ecological strategies to these trends at such extensive scales. We hypothesized  
109 that plant traits sensitive to temperature and soil moisture will co-vary with temporal warming trends  
110 while agricultural practices would have a comparatively weaker temporal influence on plant  
111 communities, as we did not expect clear temporal trends in these practices. We also expected a limited  
112 impact of agricultural practices on margin plant communities, because field margins only receive a  
113 small amount of nitrogen and herbicides drifting from neighboring plots. Furthermore, we explored  
114 the connection between Grime's CSR strategies, climate and farming practices. Considering that these  
115 strategies are linked to resource and disturbance levels, we hypothesized that they would respond to  
116 climate factors (particularly reduced soil moisture) and agricultural practices (disturbance and  
117 resource provision through fertilization). On top of the national analyses, and because this dataset  
118 includes the Mediterranean flora, which has been shown to respond more strongly to some  
119 agricultural filters (Poinas et al., 2023), we included analyses separating this region from the rest of  
120 France. We also separated vineyards from annual crops, because vineyards include very different  
121 management practices and no crop rotation (Metay et al., 2022). Finally, we also analyzed annual plant  
122 species separately, as they may respond more rapidly to environmental changes (Martin et al., 2019;  
123 Fitter & Fitter, 2002).

124

125 **Materials and methods**

126 *Vegetation surveys*

127 We used vegetation data from the 500-ENI network, which is funded by the French Ministry of  
128 Agriculture (see details in Andrade et al., 2021) and monitored 555 agricultural field margins across  
129 continental France between 2013 and 2021 (with some site turnover) (**Fig. 1**). These survey sites  
130 represented three main crop types (**Appendix A, Fig. SA. 1**): annual crops (with winter wheat or maize  
131 as the main crop production in the rotation), market gardening crops (mainly lettuce) and vineyards.  
132 The proportion of sites under organic farming was roughly 20%, but agricultural practices covered a  
133 wide range of pesticide application, fertilizers and soil management. Within each survey site, plant  
134 species were identified in ten 1 m<sup>2</sup> quadrats along the field margin (**Appendix A, Fig. SA.2**). Presence-  
135 absence of each species was recorded for each quadrat, which provided a frequency of occurrence  
136 from 0 to 10 in each field margin, used here as an index of relative abundance. Surveys were performed  
137 once per year at peak flowering (between the end of April and the beginning of August, depending on  
138 the region). At the national scale, this represented 4172 observations (year x site), leading to the  
139 identification of 852 taxa. Because observers changed among sites and over time (312 observers in  
140 total, each observer following on average 5 distinct sites during 4 years) and did not have the same  
141 level of expertise, we constrained our analyses to a subset of 142 focal species (Andrade et al., 2021)  
142 which are expected to be known by all the observers (and thus removing 11% of the total abundances).

143

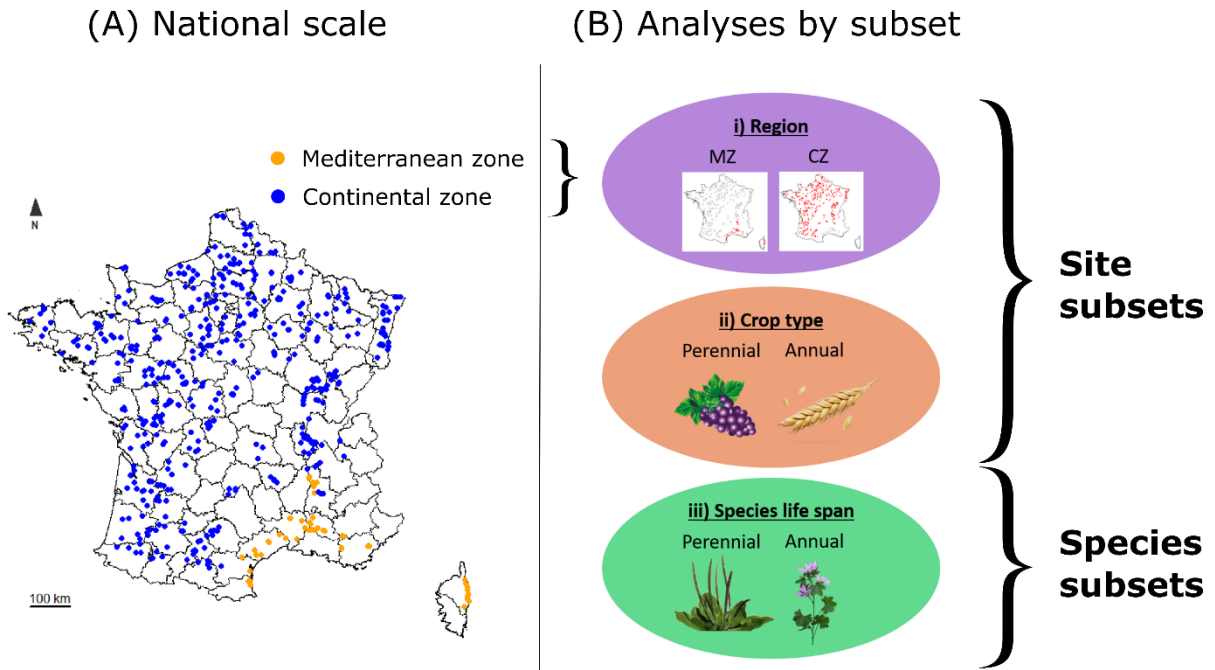

**Fig. 1.** (A) Distribution map of the 555 field margins monitored at least one year between 2013 and 2021 in France. The black lines represent the limits of French departments. Orange: sites in Mediterranean zone ( $n = 57$ ), blue: sites in Continental zone ( $n = 498$ ). The contours of the Mediterranean zone (MZ) were derived from the Mediterranean zone and Corsica as defined in the VégétalLocal map (Office français de la biodiversité, 2021); the rest of France will be referred to here as Continental zone (CZ). (B) Subsets of data used in additional analyses: i) the regional scale splits the MZ from the CZ; ii) annual crops included rotations based on wheat, maize and market gardening crops ( $n = 450$ ); perennial crops only included vineyards ( $n = 105$ ); iii) annual plants ( $n = 61$ ) opposed to perennials ( $n = 79$ ).

### *Climatic and agricultural variables*

We gathered two types of explanatory variables: the first came directly from the 500-ENI network and reflects agricultural practices assessed directly on the monitoring sites; the second one included meteorological data from an external database (see below). Here, we chose not to include landscape



160 factors, as a previous study on the same dataset demonstrated that landscape variables account for a  
161 negligible proportion of variance at the national scale, in contrast to climate (Poinas et al., 2023).

162 Agricultural practices were reported yearly from interviews of farmers into a standardized online  
163 database. Data collected relate to fertilization, herbicide use and field margin management (mainly  
164 mowing of vegetation). Daily meteorological data were extracted from the SAFRAN climate model of  
165 Météo France, with a resolution of 8 km (Le Moigne, 2002). Meteorological data were averaged over  
166 a one-year window prior to each floristic observation, while agricultural data were summed over the  
167 same period (**Table 1**). We selected variables that were weakly correlated (Spearman correlation <  
168 0.65, **Appendix B**) and have been shown to influence plant communities in previous studies (**Table 1**,  
169 see **Appendix C** for the choice of variables).

170 **Table 1.** List of explanatory factors (blue), functional traits and ecological requirements (green) and response variables (red) with their abbreviations, units  
 171 and calculation. We have illustrated by arrows the expected link of each factor and trait to the agricultural resource (fertilization) and disturbance gradient  
 172 (herbicides and margin management), and to the climatic gradient (drought and increasing temperature). We also used arrows to illustrate the expected  
 173 direction of variation of these gradients within a year (i.e. climatic and agricultural changes according to the date of observation). Horizontal arrows indicate  
 174 contradictory findings in the literature (see **Appendix C** for the references).

| Factors                                  | Abbreviations | Units       | Index used                                                                                                                                                                    | Hypothesis of response to the temporal agricultural gradient:<br>Disturbance (Di) and Resource (R) | Hypothesis of response to the temporal climatic gradient:<br>Drought (Dr) and Temperature (T) |
|------------------------------------------|---------------|-------------|-------------------------------------------------------------------------------------------------------------------------------------------------------------------------------|----------------------------------------------------------------------------------------------------|-----------------------------------------------------------------------------------------------|
| Temperature                              | TEMP          | °C          | Annual mean of daily values                                                                                                                                                   |                                                                                                    |                                                                                               |
| Soil moisture                            | MOI           | %           | Annual mean of daily values                                                                                                                                                   |                                                                                                    |                                                                                               |
| Dose of nitrogen (fertilization)         | N_DOSE        | kg/ha       | For each application:<br>$Dose = \frac{Quantity \times N \text{ of the formulation}}{100}$ Doses were summed one year before observation                                      |                                                                                                    |                                                                                               |
| Number of herbicide treatments           | HERB          |             | Treatments were summed one year before observation                                                                                                                            |                                                                                                    |                                                                                               |
| Number of field margin management events | MAN           |             | An event corresponds to the occurrence of vegetation management at a given time, most often by mowing or grinding. Management events were summed one year before observation. |                                                                                                    |                                                                                               |
| Date of observation                      | DATE          | Julian days |                                                                                                                                                                               |               |          |
|                                          |               |             |                                                                                                                                                                               |               |          |

|                                                             |                                          |                                                                                                                                                           |        |                                                                                       |                                                                                                 |
|-------------------------------------------------------------|------------------------------------------|-----------------------------------------------------------------------------------------------------------------------------------------------------------|--------|---------------------------------------------------------------------------------------|-------------------------------------------------------------------------------------------------|
| Specific leaf area                                          | SLA                                      | m <sup>2</sup> kg <sup>-1</sup>                                                                                                                           |        |    |              |
|                                                             |                                          |                                                                                                                                                           |        |    |              |
| Maximum plant height                                        | HEIGHT                                   | m                                                                                                                                                         |        |    |              |
|                                                             |                                          |                                                                                                                                                           |        |    |              |
| Seed mass                                                   | SM                                       | g                                                                                                                                                         |        |    |              |
|                                                             |                                          |                                                                                                                                                           |        |    |              |
| Flowering onset                                             | FLOW_ON                                  | months                                                                                                                                                    |        |    |              |
|                                                             |                                          |                                                                                                                                                           |        |                                                                                       |             |
| Flowering duration                                          | FLOW_DUR                                 | Months                                                                                                                                                    |        |  |            |
|                                                             |                                          |                                                                                                                                                           |        |                                                                                       |            |
| Ellenberg indicator for light, temperature, continentality, | EIV_L, EIV_T, EIV_K, EIV_F, EIV_R, EIV_N | High values of Ellenberg-L reflect heliophilous species (preference for light),<br>Ellenberg-T, thermophilous species (preference for high temperatures), | EIV_N: |  | EIV_F:<br> |

|                                                                      |                                                           |   |                                                                                                                                                                                                                                                                                                                 |                                                                                                                                                                            |        |                                                                                                                                                                                          |
|----------------------------------------------------------------------|-----------------------------------------------------------|---|-----------------------------------------------------------------------------------------------------------------------------------------------------------------------------------------------------------------------------------------------------------------------------------------------------------------|----------------------------------------------------------------------------------------------------------------------------------------------------------------------------|--------|------------------------------------------------------------------------------------------------------------------------------------------------------------------------------------------|
| <b>moisture, pH and nutrients</b>                                    |                                                           |   | Ellenberg-K, continental species (opposed to oceanic and Mediterranean species),<br>Ellenberg-F, hygrophilous species (preference for moisture),<br>Ellenberg-R, calcareous species (preference for calcareous soils),<br>Ellenberg-N, nitrophilous species (preference for fertile soils)<br>(Ellenberg, 1974) |                                                                                                                                                                            | EIV_T: | <br>               |
| <b>Species richness</b>                                              | S                                                         |   | Number of species                                                                                                                                                                                                                                                                                               | <br> |        | <br>               |
| <b>Trait composition</b>                                             | See abbreviations above for each trait preceded by "CWM_" |   | Community weighted means (CWM) : community trait values weighted by species abundance (Lavorel et al., 2008)                                                                                                                                                                                                    |                                                                                                                                                                            |        |                                                                                                                                                                                          |
| <b>Trait divergence</b>                                              | See abbreviations above for each trait preceded by "CWV_" |   | Community weighted variances (CWV) : community trait variability around the average value (Sonnier et al., 2010)                                                                                                                                                                                                |                                                                                                                                                                            |        |                                                                                                                                                                                          |
| <b>PCA traits - axis 1</b>                                           | PCA_1                                                     |   | Scores of sites or observations on the 1 <sup>st</sup> axis of the PCA including CWM of all traits                                                                                                                                                                                                              |                                                                                                                                                                            |        |                                                                                                                                                                                          |
| <b>PCA traits - axis 2</b>                                           | PCA_2                                                     |   | Scores of sites or observations on the 2 <sup>nd</sup> axis of the PCA including CWM of all traits                                                                                                                                                                                                              |                                                                                                                                                                            |        |                                                                                                                                                                                          |
| <b>Scores of competitive, stress-tolerant and ruderal strategies</b> | CWM_C,<br>CWM_S,<br>CWM_R                                 | % | Community weighted means (CWM) : community strategy values weighted by species abundance (Lavorel et al., 2008). Species scores for each strategy are computed from the leaf area, leaf dry matter content and specific leaf area (see the algorithm of Pierce et al., 2017).                                   | CWM_C:                                                                                                                                                                     |        | CWM_C:<br><br> |

---

CWM\_S:

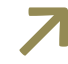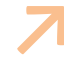

CWM\_S:

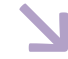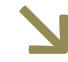

CWM\_R:

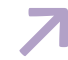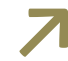

176 *Plant functional traits*

177 We extracted from external databases five functional traits and six species-level indices of ecological  
178 requirements (i.e. Ellenberg values; Ellenberg, 1974), assumed to respond to agricultural or climatic  
179 factors (**Table 1, Appendix B-C**). Functional traits were missing for four species, two of which could be  
180 imputed from an average over other species of the same genus. The remaining two species were  
181 removed from the analysis (representing 0.01% of the total abundances among the 142 species  
182 considered).

183 To characterize plant communities, we calculated species richness, community-weighted means  
184 (CWM) and community-weighted variances (CWV) of traits and ecological requirements for  
185 observations with at least three species (59 out of 4172 observations were excluded). The computation  
186 was performed using the R v.4.0.0 package `FD`, function `dbFD` for CWM, with the following formulas:

187 
$$CWM = \sum_{i=0}^n p_i \times trait_i \quad (\text{Eq. 1})$$

188 
$$CWV = \sum_{i=0}^n p_i \times (trait_i - CWM)^2 \quad (\text{Eq. 2})$$

189 Where  $p_i$  is the relative abundance,  $trait_i$  is the value of trait for species  $i$ , and  $n$  is the total number  
190 of species. To correct for correlation between CWV and species richness, we used a null model  
191 approach, shuffling the abundances in the species matrix for species of the species pool, while keeping  
192 the species x trait matrix unchanged (Bopp et al., 2022). The species pool was defined by the site,  
193 allowing us to investigate temporal variations. This procedure keeps trait correlations, species richness  
194 and total abundance in a site unchanged, while dissociating abundances from trait values (Bernard-  
195 Verdier et al., 2012). To quantify the difference between observed and null CWV, we computed effect  
196 sizes (**Appendix D**). A positive effect size denotes a divergence in trait values within the community  
197 (convergence for negative effect size). These effect sizes (and not the raw CWV) were used in our  
198 analyses and referred to as CWV in the subsequent sections. We performed a normed PCA on the  
199 CWM of traits to classify each community based on its average trait combination or ecological strategy,  
200 which is reflected by its position on the first two axes.

201

202 *Plant functional strategies*

203 According to Grime (1988), stress (i.e. a shortage of resources such as nutrients, water and light) and  
204 disturbance (i.e. the partial or total destruction of plant biomass) determine three main plant  
205 strategies representing combinations of traits that are viable under conditions of low disturbances and  
206 high resources (competitor, C), low disturbances and low resources (stress-tolerant, S) or high  
207 disturbances and high resources (ruderal, R). Originally developed to classify individual plant species  
208 into strategies, Grime's theory can be useful to interpret functional changes in plant communities,  
209 especially in the context of global changes where vegetation is subject to harsher climatic conditions  
210 (more droughts) and various levels of agricultural disturbances.

211 To assess these strategies, we extracted the CSR scores for 119 out of 142 focal species from Pierce et  
212 al. (2017). CWM of CSR scores were computed by observation and were added to the PCA on the CWM  
213 of traits as supplementary variables. They were plotted on a CSR triangle to illustrate temporal trends  
214 in strategies.

215

216 *Temporal analyses of plant communities*

217 The general framework of analyses is presented in **Fig. 2**. First, we checked if there was a temporal  
218 trend on the raw variables, and then we used climate and agricultural practices as predictors for the  
219 different response variables. In all cases, we used generalized additive mixed models (GAMM) to  
220 account for repeated measures at a site, with a Gaussian distribution in most cases (but see **Appendix**  
221 **E, Table SE.2**), and site identity as a random effect. Observer bias was accounted for by including the  
222 observer identity as a random term nested within sites. For each response variable (species richness,  
223 CWM, CWV and CSR strategies) and explanatory factor (temperature, soil moisture, nitrogen dose,  
224 herbicides and margin management), we built a first model with the year as a linear fixed effect. Then,

225 a second model was built for each response variable, where climate, agricultural practices and  
226 observation date were linear explanatory factors. A first-order temporal autocorrelation structure  
227 within sites was included (Box et al., 2015). We removed observations with missing values in climatic  
228 and agricultural factors (1805 out of 4172 observations), and a few observations that distorted trait  
229 distributions (**Appendix E**), resulting in varying observation numbers across models (see **Fig. 5**). We  
230 repeated this analysis on subsets of data, including Mediterranean (MZ) vs Continental zones (CZ),  
231 margins adjacent to annual crops vs vineyards, and annual vs perennial plant species (**Fig. 1**). For all  
232 analyses, we chose a p-value threshold of 0.01 to focus on the effects for which our confidence level  
233 was highest.

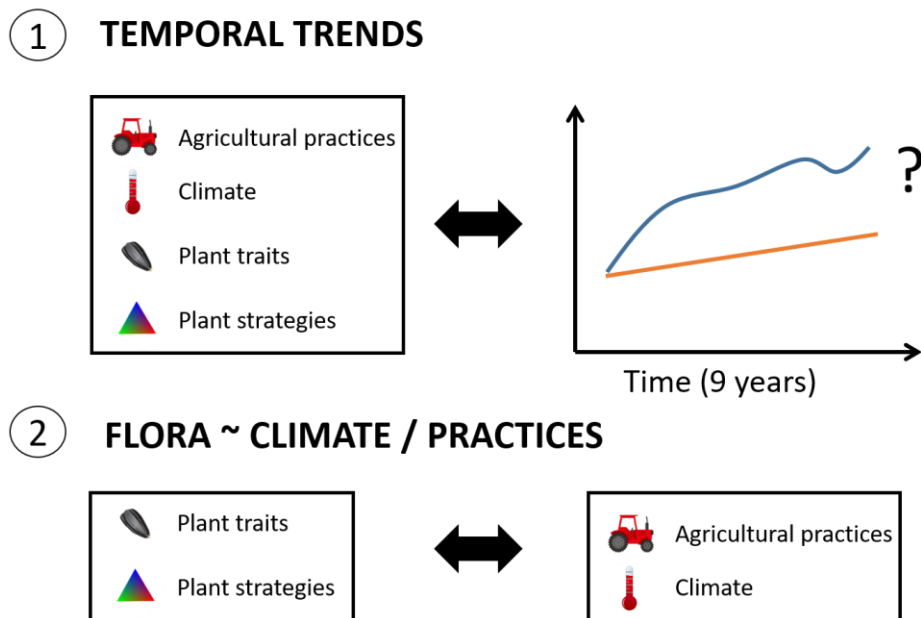

235 **Fig. 2.** General framework of our analyses involved two main steps. (1) Firstly, we investigated the  
236 presence of any temporal trends in species richness, trait composition, ecological strategies, climatic  
237 and agricultural factors, as this provides crucial insights for the subsequent analysis. Indeed, given that  
238 we expected minimal temporal trends in agricultural practices, we did not expect significant temporal  
239 changes in flora in response to practices. (2) Secondly, we explored how plant communities have  
240 responded to the temporal changes in climate and agricultural practices.

241



## 242 **Results**

### 243 *Temporal trends in climate, agricultural practices and plant communities*

244 Temperatures have significantly increased by an average of 1.2°C over a decade (0.7°C in the  
245 Mediterranean Zone), while soil moisture has steadily declined (-14.1% by decade) (**Fig. 3**, and  
246 **Appendix F**). These trends differed between the Mediterranean zone (MZ) and the Continental zone  
247 (CZ), with the MZ experiencing a slower decline in soil moisture due to a high cumulative precipitation  
248 in 2019 (**Fig. 3**). Regarding agricultural practices, herbicides slightly decreased over time in vineyards  
249 (-0.9 application by decade; **Fig. 3**), with an even weaker trend in annual crops (-0.2 application by  
250 decade). Fertilization showed no significant temporal trend, except in vineyards where the cumulative  
251 dose of nitrogen has recently slightly increased (**Fig. 3**). The number of margin management events  
252 has decreased and particularly in the MZ (-0.5 by decade). Floristic surveys were conducted  
253 increasingly earlier in the season in the CZ (10.4 days earlier by decade) (**Appendix F**). Overall, there  
254 was a clear warming and drying trend in climate, but agricultural trends were weaker.

255 Plant species richness has slightly increased over time at the national scale (+0.1 species by decade,  
256 **Fig. 5**), even more in the MZ (+0.4 species by decade) and vineyards (+0.3 species by decade) and only  
257 for annual species (**Appendix H**). We saw an increase in the CWM of maximum height (+5.8 cm by  
258 decade), seed mass (+0.2 g by decade), flowering onset (+3.1 days by decade) and a decrease in  
259 flowering duration (-7.8 days by decade, **Fig. 5**). The requirements for light, temperature and pH have  
260 increased, while those for moisture and nitrogen have declined. CWV (i.e. computed by comparison  
261 with expected CWV in a community of same richness) have decreased for most traits indicating trait  
262 convergence, and particularly for phenological traits such as flowering onset and flowering duration (-  
263 3.6 and -2.6 days by decade respectively), while they have increased for the requirements for  
264 temperature, pH and continentality, indicating trait divergence.

265 Changes in functional traits were more pronounced in the MZ, particularly for the flowering onset (+8.8  
266 days by decade) and duration (-18.9 days by decade; **Appendix F**). Conversely, changes in Ellenberg

267 values (environmental requirements) were only significant in the CZ and in annual crops. One  
268 exception was the temperature (Ellenberg-T) and moisture (Ellenberg-F) requirements, which have  
269 significantly changed in both the MZ and CZ. Interestingly, functional traits (and not environmental  
270 requirements) showed a temporal trend mainly for annual species (**Appendix F**).

271

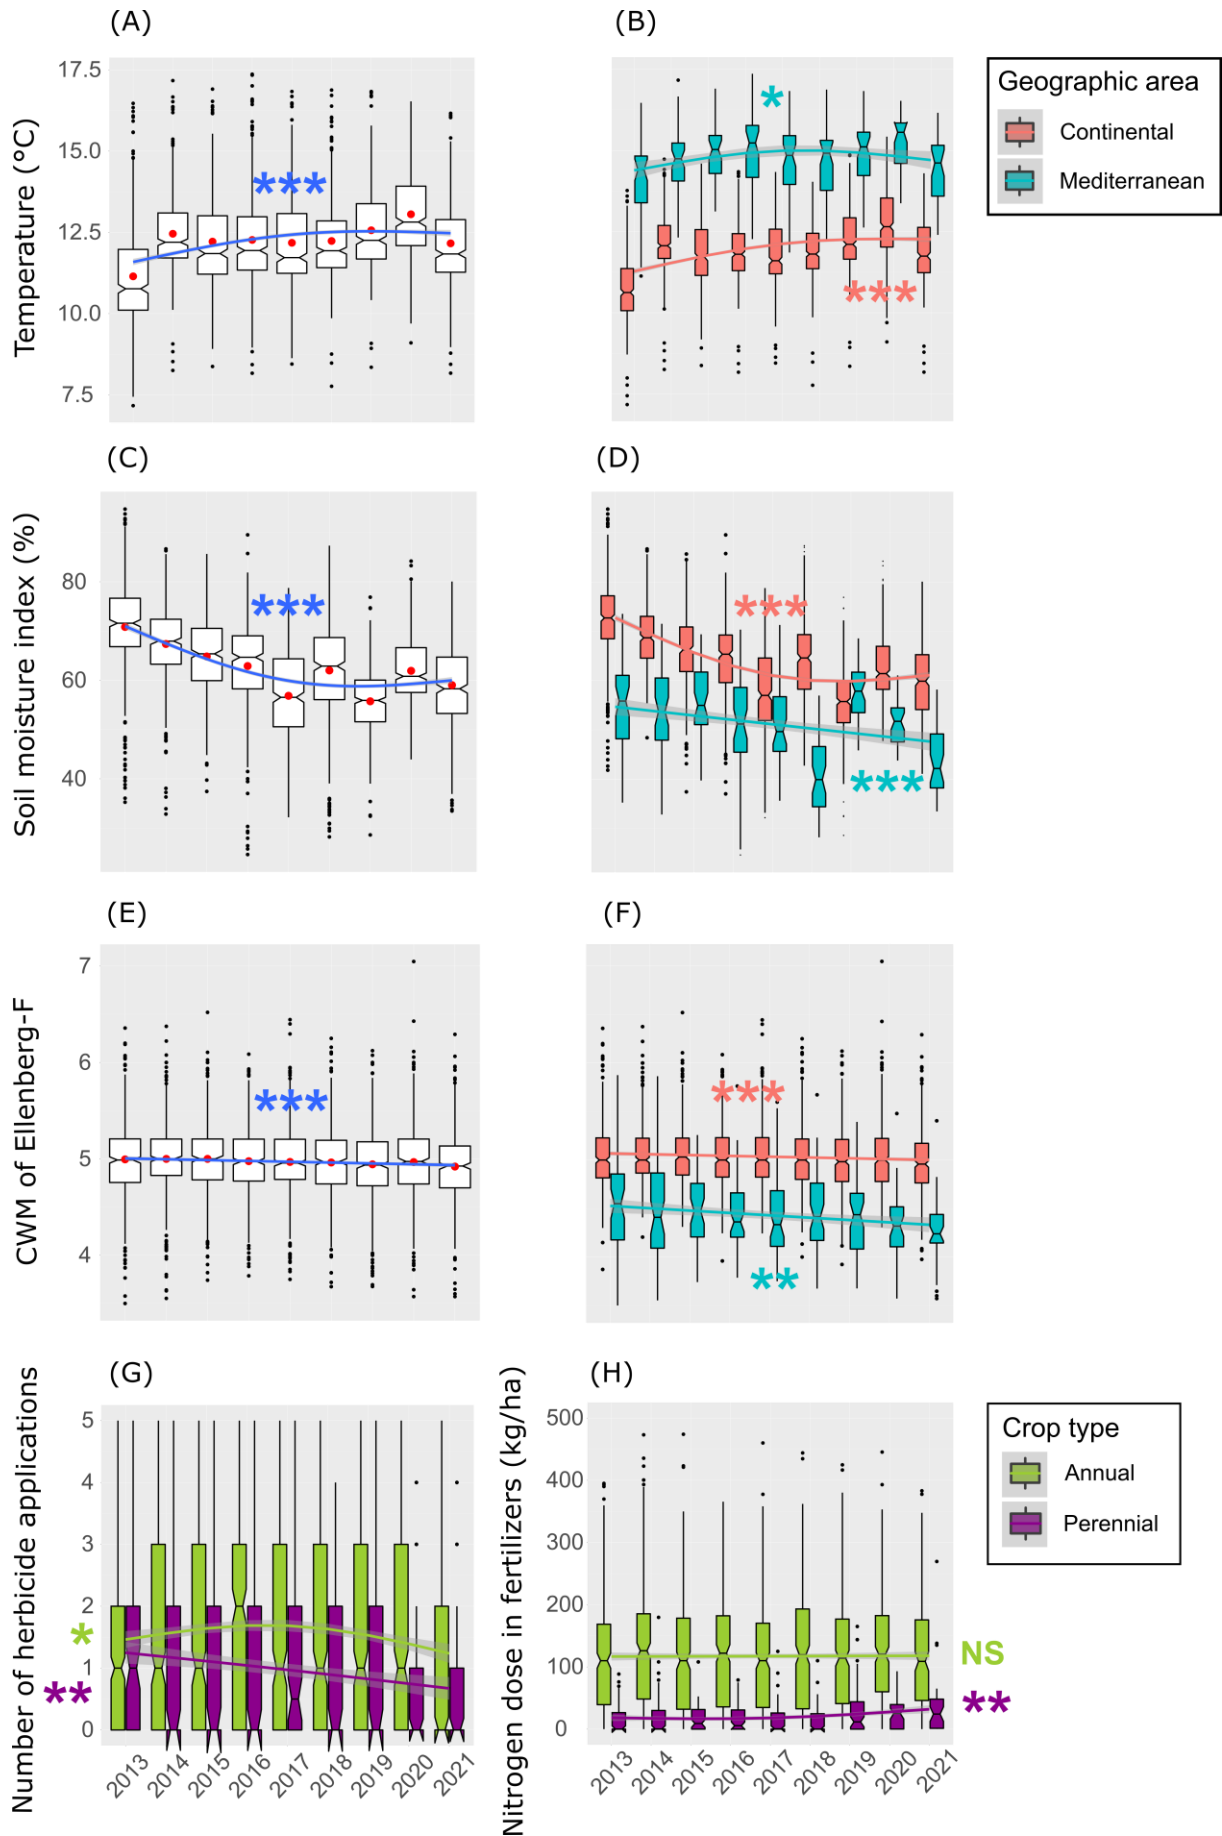

273 **Fig. 3.** Temporal changes in temperature, soil moisture, CWM of Ellenberg-F (moisture requirement),  
274 number of herbicide applications and nitrogen dose in fertilizers. Red dots represent mean values. The  
275 curves are from a GAM, with a smooth term on the year restricted to three effective degrees of  
276 freedom. (A, C, E) National trend. (B, D, F) Trend by geographic area: CZ and MZ. (G, H) Trend by crop  
277 type: annual (wheat, maize, lettuce) and perennial (vineyard). Significance of smooth terms is referred  
278 as following: NS  $p \geq 0.05$ ; \*  $p < 0.05$ ; \*\*  $p < 0.01$ ; \*\*\*  $p < 0.001$ .

279

### 280 *Functional trade-offs*

281 The first PCA axis (named thereafter stress-tolerance axis, see **Appendix G, Fig. SG.1** for the correlation  
282 of each CSR strategy with each axis) explained 29.9% of the variation in traits and revealed a gradient  
283 from continental hygrophilous communities (high Ellenberg-K and F) associated with moist and  
284 resource-rich environments (high Ellenberg-N), to Mediterranean xero-thermophilous stress-tolerant  
285 communities (high Ellenberg-T and L, low Ellenberg-F) adapted to warm, arid and resource-poor  
286 environments (**Fig. 4, Appendix G, Fig. SG.2**). Communities with continental species were more  
287 nitrophilous (high Ellenberg-N), while Mediterranean communities had a higher seed mass. The second  
288 PCA axis (named thereafter ruderal axis) explained 19.5% of the variation and contrasted stress-  
289 tolerant/conservative communities adapted to low disturbance (low SLA, high stature, late and short  
290 flowering) with ruderal/acquisitive communities adapted to high disturbance (high SLA, short stature,  
291 early and long flowering).

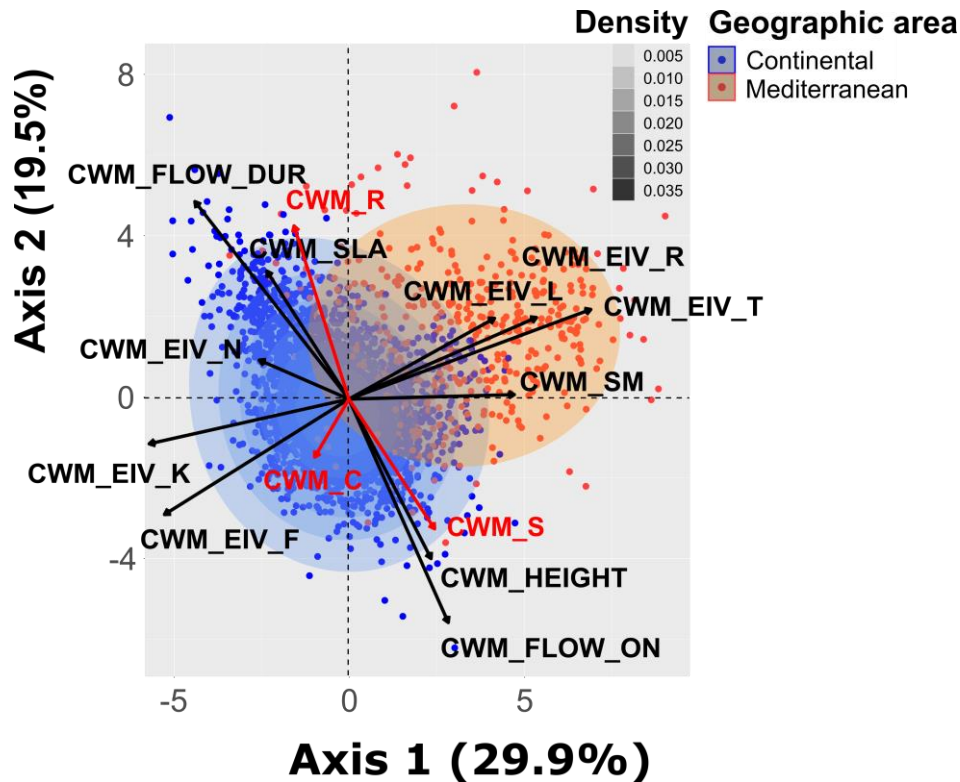

292

293 **Fig. 4.** Normed PCA on CWM (first two axes) of functional traits and ecological requirements computed  
294 by observation. The color of the dots indicates the region to which they belong and the density curve  
295 highlights the concentration of data points in a given area. The correlations of traits to the PCA axes  
296 are in **Appendix G, Fig. SG.1** and the PCA for annual and perennial species in **Fig. SG. 3**. The CWM of  
297 strategies (in red) were added as supplementary variables. Abbreviations for CWM: CWM\_SLA, specific  
298 leaf area; CWM\_HEIGHT, maximum plant height; CWM\_SM, seed mass; CWM\_FLOW\_ON, flowering  
299 onset; CWM\_FLOW\_DUR, flowering duration; CWM\_EIV\_L/T/K/F/R/N, requirement for  
300 light/temperature/continentality/moisture/pH/nitrogen; CWM\_C, competitive strategy; CWM\_S,  
301 stress-tolerant strategy; CWM\_R, ruderal strategy.

302

303 *Temporal analyses of plant communities*

304 Climatic factors were the predominant drivers of changes in community trait composition, with high  
305  $R^2$  for the temperature requirement ( $R^2 = 0.33$ ) and stress-tolerance axis (see previous section,  $R^2 =$   
306  $0.27$ , **Fig. 5**). Associations between each Ellenberg value and climatic factors opposed in a consistent

307 way Mediterranean communities to nitrophilous continental ones along the stress-tolerance axis (**Fig.**  
308 **5**). Increasing temperature increased the CWM of seed mass and Ellenberg-T (requirement for  
309 temperature) and decreased the CWM of SLA. Increasing temperature led to more divergence in the  
310 requirement for temperature and moisture (compared to a community of same richness). Conversely,  
311 increasing soil moisture brought convergence in the requirement for temperature, continentality and  
312 soil pH. Increasing temperature and drought were also associated with shorter flowering duration (-  
313 2.2 days by °C and +0.15 days by % of soil moisture), and later flowering onset only for increasing  
314 temperature (+1.6 days by °C; **Fig. 5**).

315 Margin management was the agricultural practice with the largest impact on changes in community  
316 trait composition, with an increase in its frequency associated with more ruderality (-1.2 cm in  
317 maximum height, -0.8 days in flowering onset and +2.1 days in flowering duration by management  
318 event). The date of observation also influenced changes in community trait composition, as a later  
319 observation was related to more conservative, competitive and continental communities, and to a  
320 decrease in species richness. Changes in the frequency of herbicide treatments had no significant  
321 effect, while an increasing annual nitrogen dose in fertilizers only slightly decreased the pH  
322 requirement (**Fig. 5**).

323

324

325

326

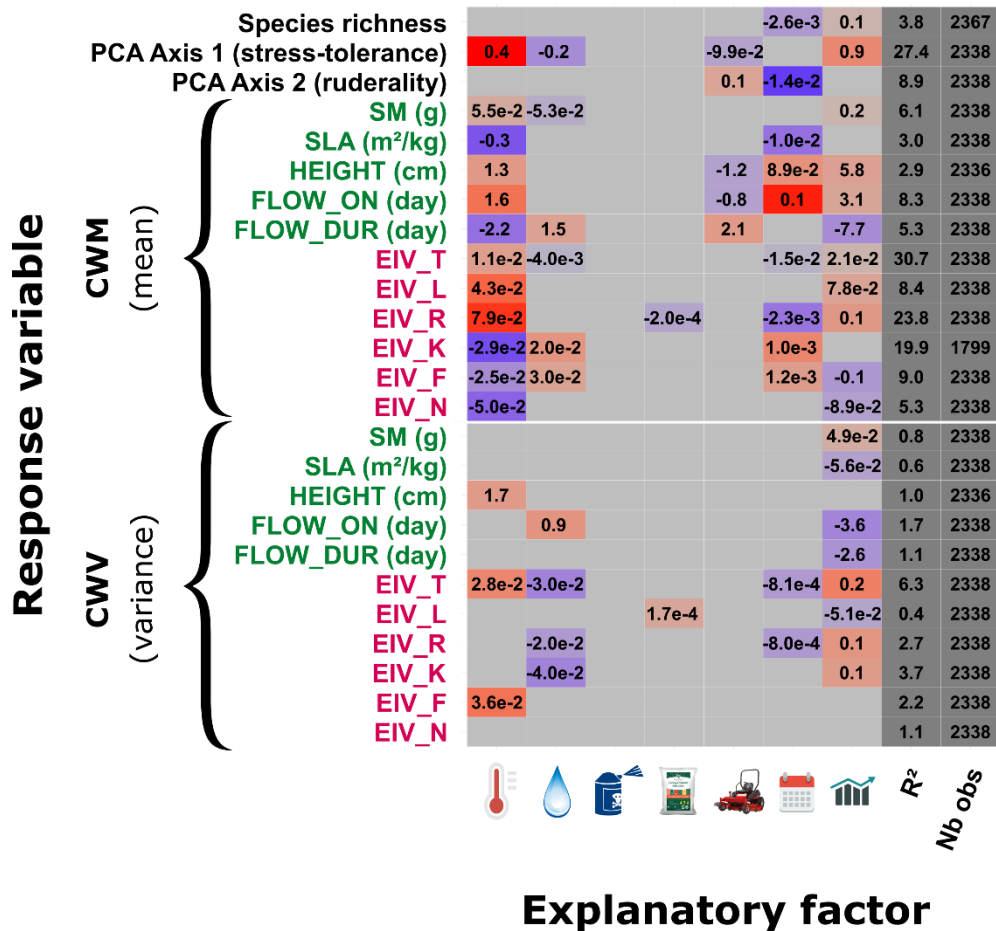

327

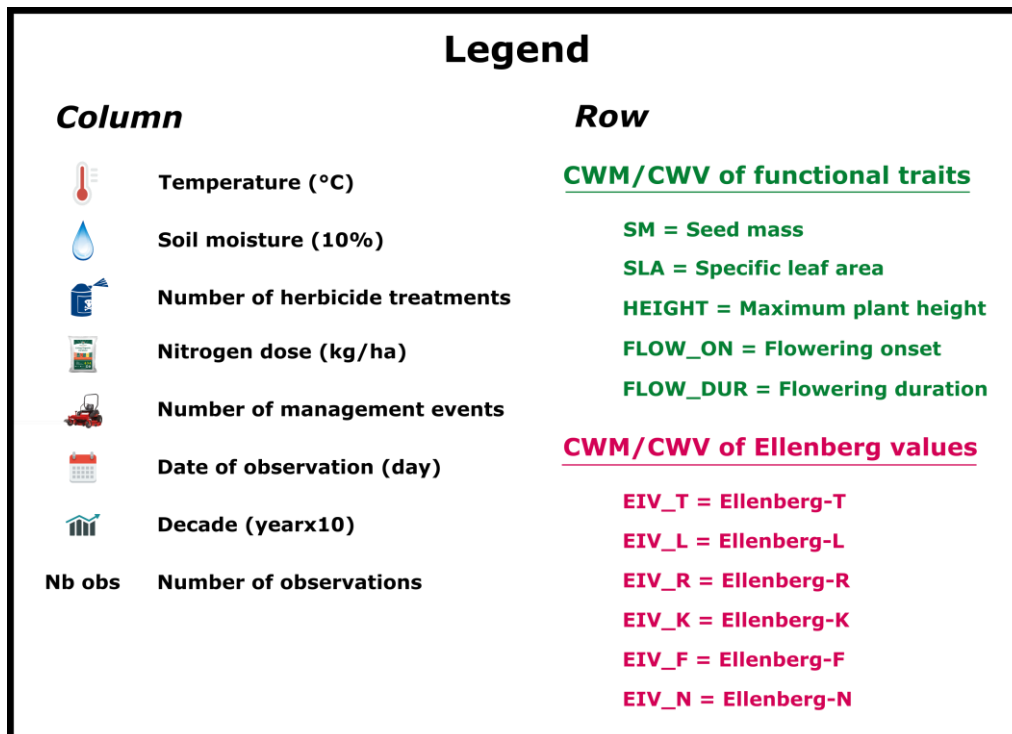

328

329 **Fig. 5.** Results of temporal models (GAMM) on the whole dataset, with response variables in rows and  
330 explanatory factors in columns. The adjusted  $R^2$ , expressed as a percentage of variation, and the  
331 number of observations are reported. Significance is indicated by colored cells, with a p-value  
332 threshold of 0.01. Positive estimates are in red, negative estimates in blue, and the strength of the  
333 relationship (based on the standardized estimates) is reflected by the lightness of the color (weaker  
334 when lighter). It is important to note that the strength of the relationship can only be compared among  
335 explanatory factors for a same response variable. Reported values are the raw estimates and can be  
336 interpreted in the units of response and explanatory variables (e.g. an increase of 1°C in temperature  
337 leads to an increase in 1.6 days in the CWM of flowering onset). Models with the year as explanatory  
338 factor were run separately.

339

340 Results differed depending on the subset of data used (**Fig. 1**). In vineyards and the MZ, changes in soil  
341 moisture did not have any influence on changes in species richness or community trait composition  
342 (**Appendix H**) and temperature only increased the requirement for temperature (Ellenberg-T) and  
343 decreased SLA. When margins were more frequently managed in the MZ, Mediterranean species  
344 declined (decrease of temperature requirement and convergence towards higher values of  
345 continentality, **Appendix H**). Increasing nitrogen dose tended to decrease the number of species in the  
346 MZ, an effect also found on annual species. In vineyards, no agricultural effect was detected at the  
347 national scale. Annuals were more impacted by climatic variations and seasonal effects (observation  
348 date) than perennials, with high  $R^2$  for temperature ( $R^2 = 0.39$ ) and moisture ( $R^2 = 0.32$ ) requirements.

349



350 **Discussion**

351 Our study is one of the first to provide empirical evidence that climate change is already resulting in  
 352 detectable functional changes in plant communities over a relatively short time interval of 10 years  
 353 (see also Martin et al., 2019) (**Fig. 6**). Climate change tended to favor the stress-tolerance strategy at  
 354 the expense of ruderality. These contrasting strategies highlight the functional trade-offs that prevent  
 355 field margin plants from simultaneously adapting to climate change and intensive agricultural  
 356 practices. Interestingly, reducing the frequency of margin management mimicked the impact of  
 357 climate change on community trait composition, although the trend was less pronounced. Practices  
 358 applied in the adjacent agricultural fields, including herbicide use and fertilization, had almost no effect  
 359 on changes in community trait composition.

360

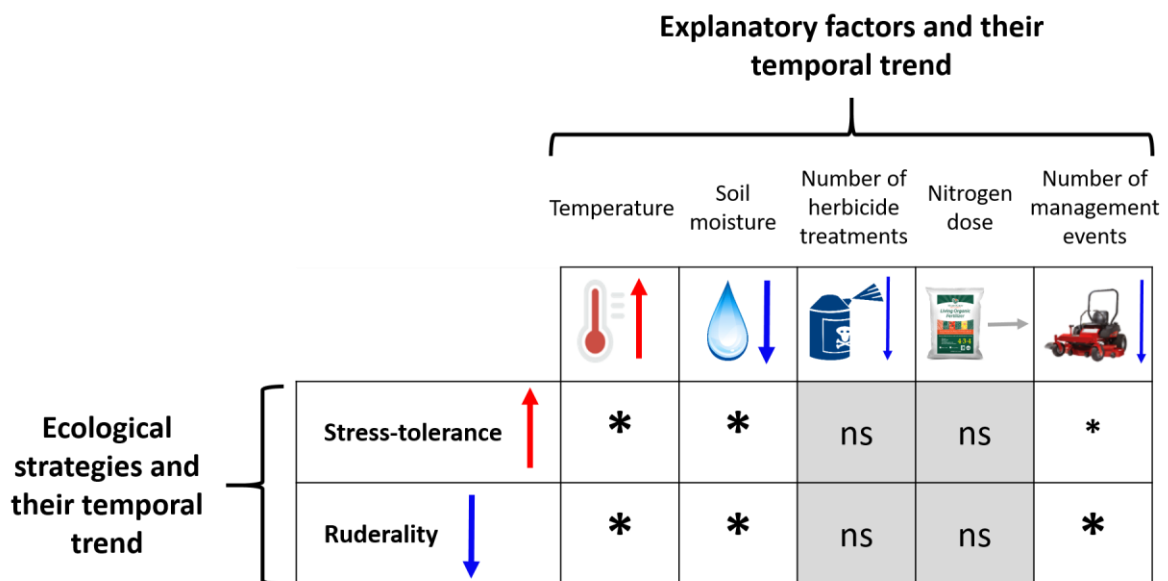

361

362 **Fig. 6.** Synthesis of results based on temporal trends and temporal analyses of community response to  
 363 changes in climate and practices. Ecological strategies are based on PCA axes (Axis 1 for stress-  
 364 tolerance and Axis 2 for ruderality) and their associated traits. Explanatory factors and ecological  
 365 strategies are depicted with their temporal trend over a decade (arrows). The asterisks illustrate the  
 366 links between temporal trends in climate and practices and the resulting trends in communities,

367 inferred from the coefficients in **Fig. 5** (ns = non-significant). The size of the asterisks represents the  
368 strength of the relationship, estimated from the number of impacted traits and standardized estimates  
369 in models.

370

371 *Climate as the main driver of temporal variations in field margin plant communities*

372 Our analyses revealed a temporal shift towards more stress-tolerant and less ruderal communities,  
373 primarily driven by climate (Díaz et al., 2016; Pakeman et al., 2009). Since meteorological variables  
374 were extracted at a 8 km resolution, changes in soil moisture can be confidently attributed to climate  
375 change and not to the effect of soil compaction due to cultivation. Increasing temperature and drought  
376 favored more xerophilous and thermophilous species, with higher seed mass and lower nitrogen  
377 requirement, thus shifting the position of communities along the stress-tolerance axis. Our results also  
378 indicated that sites increasingly warmer and drier allowed for coexistence of a wider functional set of  
379 species, suggesting an increased abundance of thermophilous species without any loss of cold-adapted  
380 species. The increase in species richness over time provided additional support for this hypothesis.

381 The increase in temperature requirement at the community-level with rising temperatures was already  
382 documented, but mainly by studies covering entire floras (regional or local species pool) and time  
383 scales of several decades to a century (Salinitro et al., 2019; Tamis et al., 2005). We found that this  
384 trend is now detectable over a short-term period of only nine years (Martin et al., 2019). Interestingly,  
385 as in other recent studies (Duchenne et al., 2021; Martin et al., 2019), this trend was more pronounced  
386 in northern France, while Mediterranean communities responded less to climate change (**Appendix**  
387 **H**). On top of the fact that climatic trends observed in the MZ were weaker than in the CZ,  
388 Mediterranean species are already adapted to drought and heat stress, and might be more resilient to  
389 extinction risks (Thuiller et al., 2005). Because of their geographic position north of the Mediterranean  
390 Sea, they might also experience some competitive release due to the lack of immigrants coming from  
391 the south, and the northward shift of more temperate species (Duchenne et al. 2021).

392 Beyond the increase in temperature requirement, our models revealed additional temporal changes  
393 related to climate change that align well with the existing literature, including a decrease in mean SLA  
394 and an increase in mean seed mass and maximum height (Alarcón Vllora et al., 2019; Kühn et al.,  
395 2021). These trait values (low SLA, high seed mass and height) are also known to be linked to less  
396 intensive agriculture (Fried et al., 2012; Richner et al., 2015). In our models, we observed a similar  
397 pattern, with less frequent margin management associated with a decrease along the ruderality axis  
398 and an increase along the stress-tolerance axis. All of this suggests that climate change and the  
399 evolution towards more extensive agricultural practices will select the same trait values towards more  
400 stress-tolerant and less ruderal strategies (MacLaren et al., 2020).

401 Finally, temporal analyses showed additional phenological changes, suggesting that climate change  
402 could increase the occurrence or abundance of late-flowering species, i.e. species that have high  
403 temperature requirement to complete their life cycle (Peters et al., 2014). These phenological shifts  
404 coincided with a decrease in trait variance, leading to trait convergence within communities. Critically,  
405 such changes can reduce the ability of species to escape field margin management, which typically  
406 favors species able to flower all-year-round, as expected with a ruderal strategy. As species will not be  
407 able to advance their phenology indefinitely, this can ultimately result in species losses in the long-  
408 term. However, farmers are likely to adapt the temporality of their practices to climate change,  
409 mitigating some of these impacts.

410

#### 411 *Agricultural practices have a weaker impact on temporal community dynamics*

412 Temporal variations in agricultural practices over the short-term had a weaker influence on field  
413 margin plant communities than climatic variations (Alarcón Vllora et al., 2019; Fried et al., 2019). Field  
414 margin management was the most impactful practice, affecting traits related to the ruderal syndrome  
415 in a consistent way. This supports the idea that field margin management, as the only practice applied

416 directly in the margin, has a greater impact than herbicides and fertilization applied in the adjacent  
417 agricultural fields, which are likely to have only collateral effects.

418 The lack of herbicide effect on community trait composition could arise because the number of  
419 herbicide applications has varied little in recent years or because we have omitted some traits that  
420 reflect herbicide tolerance (e.g. leaf cuticle thickness, hairiness). Also, reducing the intensity of  
421 agricultural practices may not necessarily influence the trait composition of communities, because  
422 agricultural intensification has already greatly reduced functional diversity, and highly diverse  
423 landscapes would be required for some species to recolonize field margins.

424 Fertilization had minimal influence on changes in community trait composition, but reduced species  
425 richness (Kleijn & Verbeek, 2000), an effect detected in the MZ and leading to the loss of some annual  
426 Mediterranean species (Poinas et al., 2023). Due to functional trade-offs, we saw that nitrophilous  
427 plant species were less thermophilous and more acidiphilous, which explains why nitrogen dose was  
428 related to affinity for acidic soils in our models. Nitrogen dose remained constant over time, which  
429 aligns with the weak change in global nitrophily levels in plant communities, suggesting that  
430 eutrophication may no longer be the primary driver of changes in arable vegetation (Alignier, 2018;  
431 Duchenne et al., 2021).

432

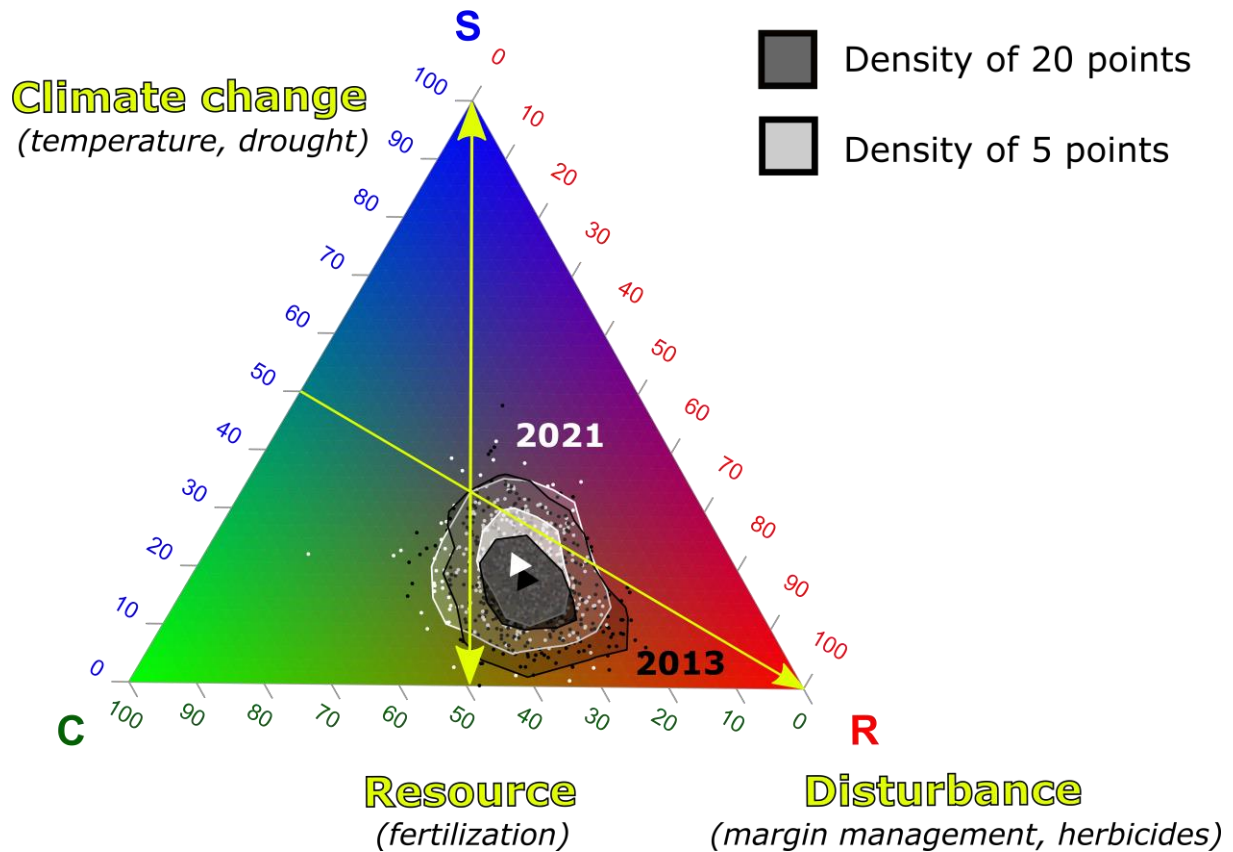

433

434 **Fig. 7.** Grime's CSR triangle depicting the temporal trajectory of community strategies between 2013  
435 and 2021. To enhance clarity, we show only two levels of density curves, with each point representing  
436 a specific site. The relative percentages of each strategy are depicted through the use of green, blue  
437 and red colors (C = competitor, S = stress-tolerant and R = ruderal). Arrows indicate expected impacts  
438 of climate change, disturbance, and resource levels. Temporal models (GAMM) applied to the CWM of  
439 each strategy revealed significant decreases in ruderality (-1.14% by decade) and competitiveness (-  
440 0.81% by decade) scores of communities, and a significant increase in stress-tolerance scores (+1.80%  
441 by decade).

442

443 *Functional trade-offs and implications for communities response to ongoing global changes*

444 Our findings revealed that resource level (driven by fertilization) and climate vary the position of  
445 communities along the stress-tolerance axis (see **Appendix I** for more results on the effect of  
446 fertilization), while disturbance level (driven by field margin management) and climate vary the

447 position of communities along the ruderal axis (**Fig. 7**). This supports the view that functional trade-  
448 offs are not only evident on a global scale as found by Wright et al. (2004) and Díaz et al. (2016), but  
449 also occur within a narrower functional range (such as plants colonizing agricultural field margins). As  
450 a result, agricultural intensification and climate change act in opposite ways on the trait composition  
451 of field margin plant communities. Climate change favors species that are adapted to high  
452 temperatures and drought, but not to intensive agriculture. It tends to expand the functional range for  
453 traits related to stress-tolerance within communities (divergence), but reduces the functional range  
454 for traits associated to ruderality (convergence). Conversely, agricultural disturbances select species  
455 more sensitive to current climatic trends, without any particular trend in trait variance.

456 These trade-offs emphasize the need to consider the existing interactions between climate and  
457 agricultural practices when predicting future community trajectories (Garnier et al., 2019; Pakeman et  
458 al., 2009). Here, we acknowledge the difficulty in quantifying these interactions, particularly given the  
459 limited changes observed in practices over time. However, the effects of practices were more  
460 perceptible with analyses focused on spatial effects (**Appendix I** and see also Poinas et al., 2023),  
461 allowing us to imagine main trends in community trajectories according to several scenarios (**Fig. 7**).  
462 Accelerating climate change coupled with an agricultural abandonment and more extensive practices  
463 in Europe (Miller et al., 2022; Peeters et al., 2021) will likely result in an increase in xero-thermophilous  
464 and conservative species. However, a large part of these species are habitat specialists (e.g.  
465 Mediterranean species as found in Munoz et al. (2017); Fried, Chauvel, et al., 2009) and have a high  
466 affinity for calcareous soils, which will probably limit their expansion towards the CZ to restricted  
467 calcareous areas, such as the Paris Basin. Areas where they are unable to colonize might suffer a  
468 decrease in species richness, and this scenario could be worsen if current levels of agricultural  
469 intensification are maintained or increased. Mediterranean species expanding in the northern half of  
470 France could face severe agricultural intensification that would likely limit their expansion, while at the  
471 same time ruderal species would become less frequent mostly because of drought. This highlights the

472 need to consider the conjunction of climate change and intensive agriculture when making future  
473 predictions.

474

## 475 **Conclusion**

476 Our study highlights climate as the primary factor affecting field margin plant communities in France,  
477 with increasing temperatures and decreasing soil moisture fostering Mediterranean, stress-tolerant  
478 and conservative species, while negatively affecting ruderal species. In comparison, agricultural  
479 practices had a limited effect on changes in species richness and trait composition, with field margin  
480 management having the greatest impact. Our study suggests that the species selected by climate  
481 change are poorly adapted to intensive farming, while the pool of species currently able to colonize  
482 field margins is restricted to a limited functional range adapted to agricultural practices. The  
483 persistence of intensive agricultural practices and accelerating climate change could thus have critical  
484 consequences for the conservation of floristic diversity in agroecosystems. However, it is important to  
485 consider the potential of adaptation of species, through intraspecific trait variability and phenotypic  
486 plasticity (known to be particularly high in ruderal species, Baker, 1974), as it may enhance their  
487 resilience to changing conditions. Our findings suggest a reduction in ruderality and an increase in  
488 stress-tolerance according to Grime's strategies. Bopp (2023) highlighted a similar increase of stress-  
489 tolerance in weeds in response to climate change, but did not observe a corresponding decrease in  
490 ruderality. Further investigations are thus necessary to assess the generalizability of these results  
491 across different habitats, including communities with broader or narrower functional niche, such as  
492 weeds. Long-term monitoring programs are necessary to address other important research questions,  
493 such as the potential time-lag in flora's response to environmental changes, the non-linearity in  
494 temporal trends and the interactive effects between climate and agricultural changes. Finally, the  
495 findings presented in this study call for rethinking our current agricultural model, urging us to prioritize  
496 the development of agricultural practices that foster the creation of favorable microclimates while

497 minimizing local intensification. Promising approaches, such as agroforestry, hold the potential to align  
498 agricultural production with biodiversity conservation goals by providing refuge habitats and  
499 microclimate regulation.



500 **Acknowledgements**

501 The 500-ENI network is developed by the French Ministry of Agriculture under the Ecophyto  
502 framework with funding from the French Biodiversity Agency (Office Français de la Biodiversité). We  
503 would like to thank everyone that has collected data in the field, the farmers who provided information  
504 on their practices, and everyone involved in the coordination of the 500-ENI data network.

505 Funding: This work was supported by an INRAE-ANSES thesis fellowship, an Ecophyto II+ project: GTP  
506 500 ENI (OFB-21-1642), and the AgriBiodiv ANR-21-CE32-006-01.

507

508 **Conflict of interest disclosure**

509 All authors of this preprint declare that they have no financial conflict of interest with the content of  
510 this article.

511

512 **Appendix A-H. Supplementary data**

513 Supplementary data associated with this article can be found, in the online version, at  
514 <https://doi.org/10.1101/2023.03.03.530956>.

515 **References**

- 516 Alarcón Villora, R., Hernández Plaza, E., Navarrete, L., Sánchez, M. J., & Sánchez, A. M. (2019). Climate  
517 and tillage system drive weed communities' functional diversity in a Mediterranean cereal-  
518 legume rotation. *Agriculture, Ecosystems & Environment*, *283*, 106574.  
519 <https://doi.org/10.1016/j.agee.2019.106574>
- 520 Alignier, A. (2018). Two decades of change in a field margin vegetation metacommunity as a result of  
521 field margin structure and management practice changes. *Agriculture, Ecosystems &*  
522 *Environment*, *251*, 1–10. <https://doi.org/10.1016/j.agee.2017.09.013>
- 523 Andrade, C., Villers, A., Balent, G., Bar-Hen, A., Chadoeuf, J., Cylly, D., Cluzeau, D., Fried, G.,  
524 Guillocheau, S., Pillon, O., Porcher, E., Tressou, J., Yamada, O., Lenne, N., Jullien, J., &  
525 Monestiez, P. (2021). A real-world implementation of a nationwide, long-term monitoring  
526 program to assess the impact of agrochemicals and agricultural practices on biodiversity.  
527 *Ecology and Evolution*, *11*(9), 3771–3793. <https://doi.org/10.1002/ece3.6459>
- 528 Baker, H. G. (1974). The Evolution of Weeds. *Annual Review of Ecology and Systematics*, *5*(1), 1–24.  
529 <https://doi.org/10.1146/annurev.es.05.110174.000245>
- 530 Baude, M., Colin, A., Calipel, C., Duvernoy, J., & Foussard, A. (2022). *Chiffres clés du climat France,*  
531 *Europe et Monde—Édition 2022* [Rapport ministériel]. Service des données et études  
532 statistiques - Ministère de la Transition écologique. [https://www.statistiques.developpement-](https://www.statistiques.developpement-durable.gouv.fr/edition-numerique/chiffres-cles-du-climat-2022/pdf/chiffres-cles-du-climat-2022-integral.pdf)  
533 [durable.gouv.fr/edition-numerique/chiffres-cles-du-climat-2022/pdf/chiffres-cles-du-climat-](https://www.statistiques.developpement-durable.gouv.fr/edition-numerique/chiffres-cles-du-climat-2022/pdf/chiffres-cles-du-climat-2022-integral.pdf)  
534 [2022-integral.pdf](https://www.statistiques.developpement-durable.gouv.fr/edition-numerique/chiffres-cles-du-climat-2022/pdf/chiffres-cles-du-climat-2022-integral.pdf)
- 535 Bellard, C., Bertelsmeier, C., Leadley, P., Thuiller, W., & Courchamp, F. (2012). Impacts of climate  
536 change on the future of biodiversity. *Ecology Letters*, *15*(4), 365–377.  
537 <https://doi.org/10.1111/j.1461-0248.2011.01736.x>
- 538 Bernard-Verdier, M., Navas, M.-L., Vellend, M., Violle, C., Fayolle, A., & Garnier, E. (2012). Community  
539 assembly along a soil depth gradient: Contrasting patterns of plant trait convergence and

- 540 divergence in a Mediterranean rangeland. *Journal of Ecology*, 100(6), 1422–1433.
- 541 <https://doi.org/10.1111/1365-2745.12003>
- 542 Bopp, M. (2023). *Dynamique spatio-temporelle des communautés d'espèces adventices en réponse aux*  
543 *pratiques de gestion des sols dans les vignobles: Une approche fonctionnelle* [Doctoral thesis,  
544 Montpellier, SupAgro]. <https://www.theses.fr/s225831>
- 545 Bopp, M.-C., Kazakou, E., Metay, A., & Fried, G. (2022). Relative importance of region, seasonality and  
546 weed management practice effects on the functional structure of weed communities in French  
547 vineyards. *Agriculture, Ecosystems & Environment*, 330, 107892.  
548 <https://doi.org/10.1016/j.agee.2022.107892>
- 549 Borgy, B., Violle, C., Choler, P., Denelle, P., Munoz, F., Kattge, J., Lavorel, S., Loranger, J., Amiaud, B.,  
550 Bahn, M., van Bodegom, P. M., Brisse, H., Debarros, G., Diquelou, S., Gachet, S., Jolivet, C.,  
551 Lemauviel-Lavenant, S., Mikolajczak, A., Olivier, J., ... Garnier, E. (2017). Plant community  
552 structure and nitrogen inputs modulate the climate signal on leaf traits. *Global Ecology and*  
553 *Biogeography*, 26(10), 1138–1152. <https://doi.org/10.1111/geb.12623>
- 554 Box, G. E. P., Jenkins, G. M., Reinsel, G. C., & Ljung, G. M. (2015). *Time Series Analysis: Forecasting and*  
555 *Control*. John Wiley & Sons.
- 556 Díaz, S., Kattge, J., Cornelissen, J. H. C., Wright, I. J., Lavorel, S., Dray, S., Reu, B., Kleyer, M., Wirth, C.,  
557 Colin Prentice, I., Garnier, E., Bönisch, G., Westoby, M., Poorter, H., Reich, P. B., Moles, A. T.,  
558 Dickie, J., Gillison, A. N., Zanne, A. E., ... Gorné, L. D. (2016). The global spectrum of plant form  
559 and function. *Nature*, 529(7585). <https://doi.org/10.1038/nature16489>
- 560 Duchenne, F., Martin, G., & Porcher, E. (2021). European plants lagging behind climate change pay a  
561 climatic debt in the North, but are favoured in the South. *Ecology Letters*, 24(6), 1178–1186.  
562 <https://doi.org/10.1111/ele.13730>
- 563 Ellenberg, H. (1974). Indicator values of vascular plants in central Europe. *Scripta Geobotanica*, 9, 97.
- 564 Emmerson, M., Morales, M. B., Oñate, J. J., Batáry, P., Berendse, F., Liira, J., Aavik, T., Guerrero, I.,  
565 Bommarco, R., Eggers, S., Pärt, T., Tschardt, T., Weisser, W., Clement, L., & Bengtsson, J.

- 566 (2016). How Agricultural Intensification Affects Biodiversity and Ecosystem Services. In  
567 *Advances in Ecological Research* (Vol. 55, pp. 43–97). Elsevier.  
568 <https://linkinghub.elsevier.com/retrieve/pii/S0065250416300204>
- 569 Fitter, A. H., & Fitter, R. S. R. (2002). Rapid Changes in Flowering Time in British Plants. *Science*,  
570 296(5573), 1689–1691. <https://doi.org/10.1126/science.1071617>
- 571 Fonty, E., Sarthou, C., Larpin, D., & Ponge, J.-F. (2009). A 10-year decrease in plant species richness on  
572 a neotropical inselberg: Detrimental effects of global warming? *Global Change Biology*, 15(10),  
573 2360–2374. <https://doi.org/10.1111/j.1365-2486.2009.01923.x>
- 574 Fried, G., Blanchet, C., Cazenave, L., Bopp, M.-C., Kazakou, E., Metay, A., Christen, M., Alard, D., &  
575 Cordeau, S. (2022). Consistent response of weeds according to Grime’s CSR strategies along  
576 disturbance and resource gradients in Bordeaux vineyards. *Weed Research*, 62(5), 347–359.  
577 <https://doi.org/10.1111/wre.12549>
- 578 Fried, G., Chauvel, B., & Reboud, X. (2009). A functional analysis of large-scale temporal shifts from  
579 1970 to 2000 in weed assemblages of sunflower crops in France. *Journal of Vegetation Science*,  
580 20(1), 49–58. <https://doi.org/10.1111/j.1654-1103.2009.05284.x>
- 581 Fried, G., Cordeau, S., Metay, A., & Kazakou, E. (2019). Relative importance of environmental factors  
582 and farming practices in shaping weed communities structure and composition in French  
583 vineyards. *Agriculture, Ecosystems & Environment*, 275, 1–13.  
584 <https://doi.org/10.1016/j.agee.2019.01.006>
- 585 Fried, G., Kazakou, E., & Gaba, S. (2012). Trajectories of weed communities explained by traits  
586 associated with species’ response to management practices. *Agriculture, Ecosystems &*  
587 *Environment*, 158, 147–155. <https://doi.org/10.1016/j.agee.2012.06.005>
- 588 Gaba, S., Fried, G., Kazakou, E., Chauvel, B., & Navas, M.-L. (2014). Agroecological weed control using  
589 a functional approach: A review of cropping systems diversity. *Agronomy for Sustainable*  
590 *Development*, 34(1), 103–119. <https://doi.org/10.1007/s13593-013-0166-5>

- 591 Garnier, E., & Navas, M.-L. (2012). A trait-based approach to comparative functional plant ecology:  
592 Concepts, methods and applications for agroecology. A review. *Agronomy for Sustainable*  
593 *Development*, 32(2), 365–399. <https://doi.org/10.1007/s13593-011-0036-y>
- 594 Garnier, E., Vile, D., Roumet, C., Lavorel, S., Grigulis, K., Navas, M.-L., & Lloret, F. (2019). Inter- and  
595 intra-specific trait shifts among sites differing in drought conditions at the north western edge  
596 of the Mediterranean Region. *Flora*, 254, 147–160.  
597 <https://doi.org/10.1016/j.flora.2018.07.009>
- 598 Grime, J. P. (1977). Evidence for the existence of three primary strategies in plants and its relevance to  
599 ecological and evolutionary theory. *The American Naturalist*, 111(982), 1169–1194.
- 600 Grime, J. P. (1988). The C-S-R model of primary plant strategies—Origins, implications and tests. In L.  
601 D. Gottlieb & S. K. Jain, *Plant Evolutionary Biology* (pp. 371–393). Springer Netherlands.  
602 [https://doi.org/10.1007/978-94-009-1207-6\\_14](https://doi.org/10.1007/978-94-009-1207-6_14)
- 603 Grime, J. P. (2006). Trait convergence and trait divergence in herbaceous plant communities:  
604 Mechanisms and consequences. *Journal of Vegetation Science*, 17(2), 255–260.  
605 <https://doi.org/10.1111/j.1654-1103.2006.tb02444.x>
- 606 Guichard, L., Dedieu, F., Jeuffroy, M.-H., Meynard, J.-M., Reau, R., & Savini, I. (2017). Le plan Ecophyto  
607 de réduction d’usage des pesticides en France: Décryptage d’un échec et raisons d’espérer.  
608 *Cahiers Agricultures*, 26(1). <https://doi.org/10.1051/cagri/2017004>
- 609 Kleijn, D., & Verbeek, M. (2000). Factors affecting the species composition of arable field boundary  
610 vegetation. *Journal of Applied Ecology*, 37(2), 256–266. [https://doi.org/10.1046/j.1365-](https://doi.org/10.1046/j.1365-2664.2000.00486.x)  
611 [2664.2000.00486.x](https://doi.org/10.1046/j.1365-2664.2000.00486.x)
- 612 Kühn, N., Tovar, C., Carretero, J., Vandvik, V., Enquist, B. J., & Willis, K. J. (2021). Globally important  
613 plant functional traits for coping with climate change. *Frontiers of Biogeography*, 13(4).  
614 <https://doi.org/10.21425/F5FBG53774>
- 615 Lavorel, S., Grigulis, K., McIntyre, S., Williams, N. S. G., Garden, D., Dorrough, J., Berman, S., Quétier,  
616 F., Thébault, A., & Bonis, A. (2008). Assessing functional diversity in the field – methodology

- 617 matters! *Functional Ecology*, 22(1), 134–147. <https://doi.org/10.1111/j.1365->  
618 2435.2007.01339.x
- 619 Le Moigne, P. (2002). *Description de l'analyse des champs de surface sur la France par le système*  
620 *SAFRAN* (pp. 1–30) [Note de centre GMME]. Météo-France.
- 621 Lososová, Z., Chytrý, M., Cimalová, S., Kropáč, Z., Otýpková, Z., Pyšek, P., & Tichý, L. (2004). Weed  
622 vegetation of arable land in Central Europe: Gradients of diversity and species composition.  
623 *Journal of Vegetation Science*, 15(3), 415–422. <https://doi.org/10.1111/j.1654->  
624 1103.2004.tb02279.x
- 625 Lovejoy, T. E. (2006). *Climate Change and Biodiversity*. Yale University Press.
- 626 MacLaren, C., Storkey, J., Menegat, A., Metcalfe, H., & Dehnen-Schmutz, K. (2020). An ecological future  
627 for weed science to sustain crop production and the environment. A review. *Agronomy for*  
628 *Sustainable Development*, 40(4), 24. <https://doi.org/10.1007/s13593-020-00631-6>
- 629 Martin, G., Devictor, V., Motard, E., Machon, N., & Porcher, E. (2019). Short-term climate-induced  
630 change in French plant communities. *Biology Letters*, 15(7), 20190280.  
631 <https://doi.org/10.1098/rsbl.2019.0280>
- 632 Metay, A., Garcia, L., Kazakou, E., & Fried, G. (2022). Effet des couverts sur la flore en viticulture.  
633 *Agronomie, Environnement & Sociétés*, 12(1). [https://hal-montpellier-supagro.archives-](https://hal-montpellier-supagro.archives-ouvertes.fr/hal-03776173)  
634 [ouvertes.fr/hal-03776173](https://hal-montpellier-supagro.archives-ouvertes.fr/hal-03776173)
- 635 Miller, D., Legras, S., Barnes, A., Cazacu, M., Gava, O., Helin, J., Irvine, K., Kantelhardt, J., Landert, J.,  
636 Latruffe, L., Mayer, A., Niedermayr, A., Povellato, A., Schaller, L., Schwarz, G., Smith, P., Vanni,  
637 F., Védrine, L., Viaggi, D., ... Vlahos, G. (2022). Creating Conditions for Harnessing the Potential  
638 of Transitions to Agroecology in Europe and Requirements for Policy. *EuroChoices*, 21(3), 72–  
639 79. <https://doi.org/10.1111/1746-692X.12374>
- 640 Munoz, F., Fried, G., Armengot, L., Bourgeois, B., Bretagnolle, V., Chadoeuf, J., Mahaut, L., Plumejeaud,  
641 C., Storkey, J., Violle, C., & Gaba, S. (2017). *Database of weeds in cultivation fields of France*

- 642            *and UK, with ecological and biogeographical information* [dataset]. Zenodo.  
643            <https://doi.org/10.5281/zenodo.1112342>
- 644 Murray, B. R., Brown, A. H. D., Dickman, C. R., & Crowther, M. S. (2004). Geographical gradients in seed  
645 mass in relation to climate. *Journal of Biogeography*, 31(3), 379–388.  
646            <https://doi.org/10.1046/j.0305-0270.2003.00993.x>
- 647 Office français de la biodiversité. (2021). *Carte des régions d'origine—Référentiel technique de la*  
648            *marque Végétal local—Version 2021*. [www.vegetal-local.fr](http://www.vegetal-local.fr)
- 649 Oliver, T. H., & Morecroft, M. D. (2014). Interactions between climate change and land use change on  
650 biodiversity: Attribution problems, risks, and opportunities. *WIREs Climate Change*, 5(3), 317–  
651 335. <https://doi.org/10.1002/wcc.271>
- 652 Pakeman, R. J., Lepš, J., Kleyer, M., Lavorel, S., Garnier, E., & Consortium, the V. (2009). Relative  
653 climatic, edaphic and management controls of plant functional trait signatures. *Journal of*  
654            *Vegetation Science*, 20(1), 148–159. <https://doi.org/10.1111/j.1654-1103.2009.05548.x>
- 655 Peeters, A., Lefebvre, O., & Balogh, L. (2020). A Green Deal for implementing agroecological systems:  
656            Reforming the Common Agricultural Policy of the European Union. *Journal of Sustainable and*  
657            *Organic Agricultural Systems*, 70, 83–93. <https://doi.org/10.3220/LBF1610123299000>
- 658 Peters, K., Breitsameter, L., & Gerowitt, B. (2014). Impact of climate change on weeds in agriculture: A  
659            review. *Agronomy for Sustainable Development*, 34(4), 707–721.  
660            <https://doi.org/10.1007/s13593-014-0245-2>
- 661 Pierce, S., Negreiros, D., Cerabolini, B. E. L., Kattge, J., Díaz, S., Kleyer, M., Shipley, B., Wright, S. J.,  
662            Soudzilovskaia, N. A., Onipchenko, V. G., van Bodegom, P. M., Frenette-Dussault, C., Weiher,  
663            E., Pinho, B. X., Cornelissen, J. H. C., Grime, J. P., Thompson, K., Hunt, R., Wilson, P. J., ...  
664            Tampucci, D. (2017). A global method for calculating plant CSR ecological strategies applied  
665            across biomes world-wide. *Functional Ecology*, 31(2), 444–457. [https://doi.org/10.1111/1365-](https://doi.org/10.1111/1365-2435.12722)  
666            [2435.12722](https://doi.org/10.1111/1365-2435.12722)

- 667 Poinas, I., Fried, G., Henckel, L., & Meynard, C. N. (2023). Agricultural drivers of field margin plant  
668 communities are scale-dependent. *Basic and Applied Ecology*, *72*, 55–63.  
669 <https://doi.org/10.1016/j.baae.2023.08.003>
- 670 Richner, N., Holderegger, R., Linder, H. P., & Walter, T. (2015). Reviewing change in the arable flora of  
671 Europe: A meta-analysis. *Weed Research*, *55*(1), 1–13. <https://doi.org/10.1111/wre.12123>
- 672 Salinitro, M., Alessandrini, A., Zappi, A., & Tassoni, A. (2019). Impact of climate change and urban  
673 development on the flora of a southern European city: Analysis of biodiversity change over a  
674 120-year period. *Scientific Reports*, *9*(1). <https://doi.org/10.1038/s41598-019-46005-1>
- 675 Sonnier, G., Shipley, B., & Navas, M.-L. (2010). Quantifying relationships between traits and explicitly  
676 measured gradients of stress and disturbance in early successional plant communities. *Journal*  
677 *of Vegetation Science*, *21*(6), 1014–1024. <https://doi.org/10.1111/j.1654-1103.2010.01210.x>
- 678 Tamis, W. L. M., Zelfde, M. V., Der Meijden, R. V., & De Haes, H. A. U. (2005). Changes in Vascular Plant  
679 Biodiversity in the Netherlands in the 20th Century Explained by their Climatic and other  
680 Environmental Characteristics. *Climatic Change*, *72*(1), 37–56.  
681 <https://doi.org/10.1007/s10584-005-5287-7>
- 682 Thuiller, W., Lavorel, S., Araújo, M. B., Sykes, M. T., & Prentice, I. C. (2005). Climate change threats to  
683 plant diversity in Europe. *Proceedings of the National Academy of Sciences*, *102*(23), 8245–  
684 8250. <https://doi.org/10.1073/pnas.0409902102>
- 685 Wheeler, G. R., Brassil, C. E., & Knops, J. M. H. (2023). Functional traits' annual variation exceeds  
686 nitrogen-driven variation in grassland plant species. *Ecology*, *104*(2), e3886.  
687 <https://doi.org/10.1002/ecy.3886>
- 688 Wright, I. J., Reich, P. B., Westoby, M., Ackerly, D. D., Baruch, Z., Bongers, F., Cavender-Bares, J., Chapin,  
689 T., Cornelissen, J. H. C., Diemer, M., Flexas, J., Garnier, E., Groom, P. K., Gulias, J., Hikosaka, K.,  
690 Lamont, B. B., Lee, T., Lee, W., Lusk, C., ... Villar, R. (2004). The worldwide leaf economics  
691 spectrum. *Nature*, *428*(6985). <https://doi.org/10.1038/nature02403>
- 692
